# Supplementary material for: Unlocking Potassium Constraints for China's Food Security
Source: Research Square preprint supplement (doi:10.21203/rs.3.rs-7003042/v1), 2025-09-17
Supplement: Supplementary file 1 [file f1e8476b7e3a990a962a56c3.pdf]

# Supporting Information for

## Unlocking Potassium Constraints for China's Food Security

Yan-Fei Liu<sup>1</sup>, Tao Dai<sup>2,3</sup>, Peng Wang<sup>4,5\*</sup>, Yvette Baninla<sup>6,7</sup>, Cheo Emmanuel Suh<sup>8</sup>, Kangxin An<sup>1</sup>,  
Xiangbo Xu<sup>9</sup>, Zhongkui Han<sup>2,3</sup>, Can Wang<sup>1,10\*</sup>

1 School of Environment, Tsinghua University, Beijing, 100084, China

2 Institute of Mineral Resources, Chinese Academy of Geological Sciences, Beijing, 100037,  
China

3 Research Center for Strategy of Global Mineral Resources, Chinese Academy of Geological  
Sciences, Beijing, 100037, China

4 Key Lab of Urban Environment and Health, Institute of Urban Environment, Chinese  
Academy of Sciences, Xiamen, 361021, China

5 University of Chinese Academy of Sciences, Beijing, 100049, China

6 The Robert M. Buchan Department of Mining, Smith Engineering, Queen's University,  
Kingston, Ontario K7L 3N6, Canada

7 Department of Geology, Mining & Environmental Science, University of Bamenda, Bambili,  
North West Region, Cameroon

8 Faculty of Science - Geology Department, University of Bamenda, North West Region,  
Cameroon

9 Key Laboratory of Ecosystem Network Observation and Modeling, Institute of Geographic  
Sciences and Natural Resources Research, Chinese Academy of Sciences, Beijing, 100101,  
China

10 Institute of Carbon Neutrality, Tsinghua University, Beijing, 100084, China

\*Email: pwang@iue.ac.cn

\*Email: canwang@tsinghua.edu.cn

## S1. Supplement background

### S1.1 Abbreviated letter index table

Table S1. List of abbreviations

| Abbreviation | Full name                                                      | Abbreviation       | Full name |
|--------------|----------------------------------------------------------------|--------------------|-----------|
| K            | Potassium                                                      | Germany            | DEU       |
| P            | Phosphorus                                                     | France             | FRA       |
| N            | Nitrogen                                                       | Italy              | ITA       |
| BAU          | the business-as-usual scenario                                 | The United Kingdom | GBR       |
| DA           | the diet adjusted scenario                                     | Canada             | CAN       |
| IMFA         | increasing mineral K fertilizer application scenario           | China              | CHN       |
| EMMFA        | European model mineral K fertilizer application scenario       | Japan              | JPN       |
| NAMMFA       | North American model mineral K fertilizer application scenario | Korea              | KOR       |
| Netherlands  | NLD                                                            | Russia             | RUS       |
| Belarus      | BLR                                                            | Israel             | ISR       |
| Jordan       | JOR                                                            | The United States  | USA       |
| Laos         | LAO                                                            | Chile              | CHL       |

## S1.2 The regional classification of the 31 provinces

China is divided into seven regions: Northeast China (i.e., Liaoning, Jilin, Heilongjiang), North China (i.e., Beijing, Tianjin, Hebei, Shanxi, Inner Mongolia), East China (i.e., Shandong, Jiangsu, Shanghai, Zhejiang, Anhui, Jiangxi, Fujian), Central China (i.e., Hunan, Hubei, Henan), South China (Guangdong, Guangxi, Hainan), Southwest China (i.e., Sichuan, Chongqing, Guizhou, Yunnan, Tibet), and Northwest China (i.e., Gansu, Shaanxi, Xinjiang, Ningxia, Qinghai).

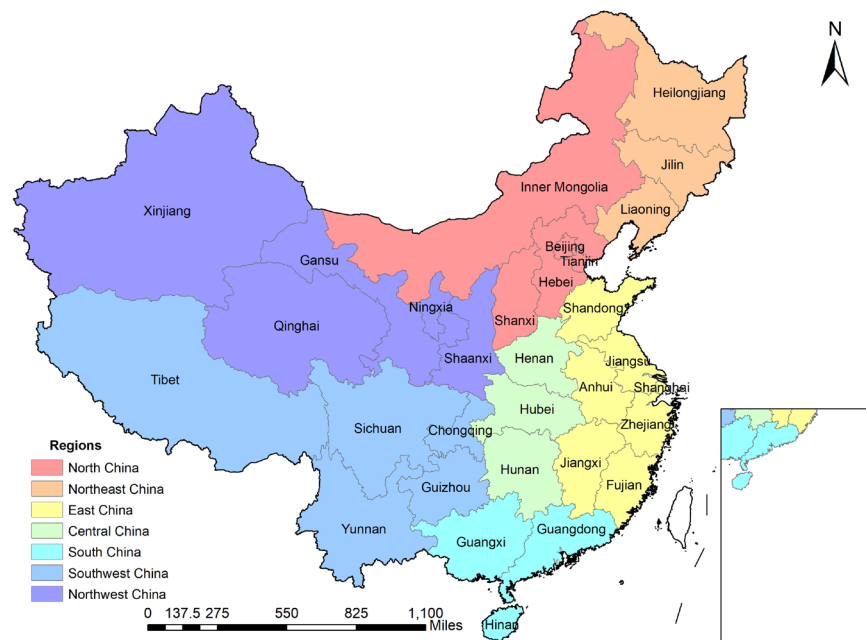

Fig. S1 The regional classification of the 31 provinces in China in this study.

### S1.3 Global potash reserve

The global reserve of potash exceeds 4.8 billion tons in 2023. However, the potash reserve in China is only 180.0 Mt in 2023, accounting for less than 3.8% of the global reserve.

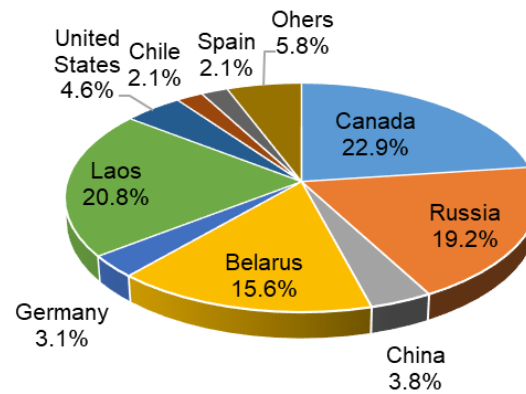

Fig. S2 Global potash reserve in 2023

### S1.4 Global potash production

#### (1) Global potash production in 2023

The global production of potash is concentrated in a few countries, primarily Canada, Russia, China, and Belarus. In 2023, the total global potash production reached 43.3mt/year, with Canada, Russia, China, and Belarus accounting for 76.2% of the total production, while other countries contributed only 23.8%.

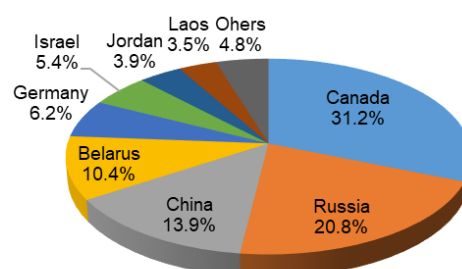

Fig. S3 Global potash production in 2023

Africa's annual demand for potash is approximately 1,110 kt ( $K_2O$ ), but the continent is entirely dependent on imports. The primary potash suppliers to Africa are Europe, Russia, and Jordan. However, the Israel-Palestine conflict has severely affected the Red Sea and surrounding waters, leading to reduced transport capacity through the Suez Canal. This will inevitably impact potash exports from Europe and Jordan to Southern Africa. Additionally, drought-induced challenges at the Panama Canal have constrained Canada's potash export capacity. The ongoing Russia-Ukraine conflict further increases the uncertainty of the global potash supply chain. Although production has risen in Southeast Asia, particularly in Laos and Thailand, their supply is primarily directed toward East Asia<sup>1</sup>.

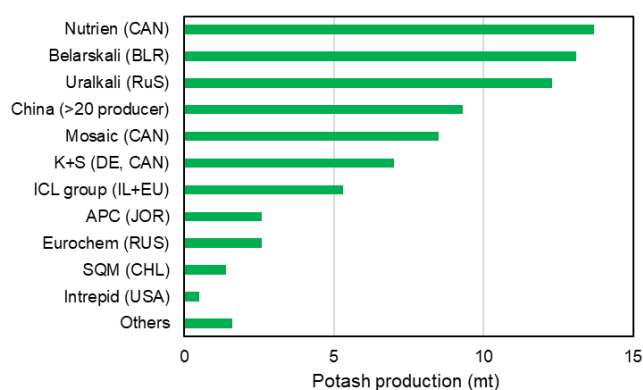

Fig. S4 Potash production in 2021

Reference: <sup>2</sup>

### S1.5 Mineral K fertilizer production

Global mineral K fertilizer production has shown a slow upward trend, reaching 42.91 mt/year in 2022, approximately 1.8-fold compared with that in 1992. The cumulative global mineral K fertilizer production totaled 1,014.7 from 1992 to 2021. Notably, China has been the fastest-growing country in mineral K fertilizer production, reaching 4.134 mt/year in 2022, accounting for 9.6% of the global total production.

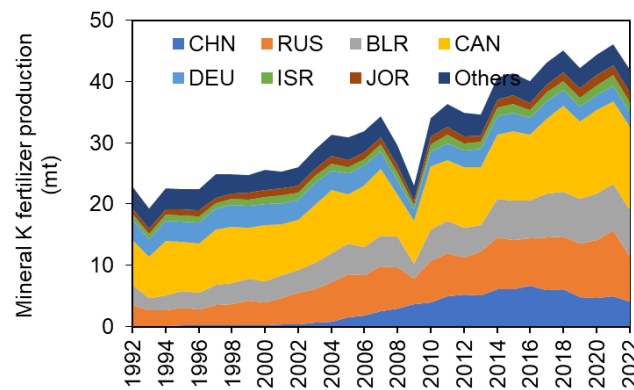

Fig. S5 Mineral K fertilizer production from 1990 to 2022

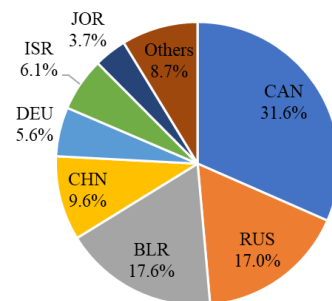

Fig. S6 Distribution of mineral K production in 2022

### S1.6 The import volume of mineral K fertilizer

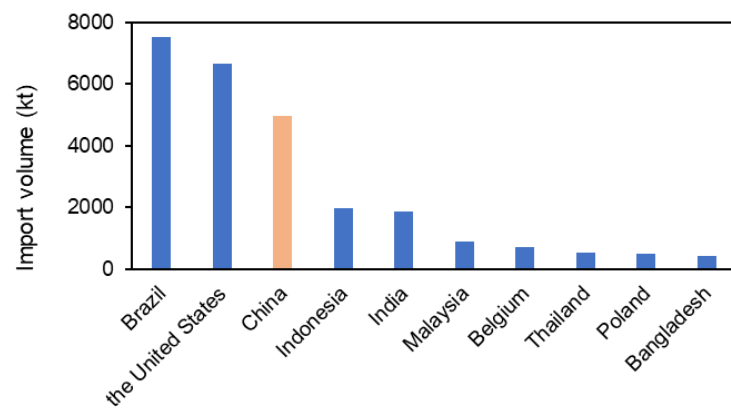

Fig. S7 The top 10 importers of mineral K fertilizer

**S1.7 Food Consumption and Dietary Structure of 31 Provinces in China in 2022**

There are significant regional differences in dietary patterns across China’s 31 provinces. For example, in 2022, the proportion of plant-based food consumption in total food consumption ranged from 83% to 86% in northwestern provinces such as Gansu, Shaanxi, and Ningxia. In contrast, in southern provinces like Guangdong and Hainan, the proportion was around 70%.

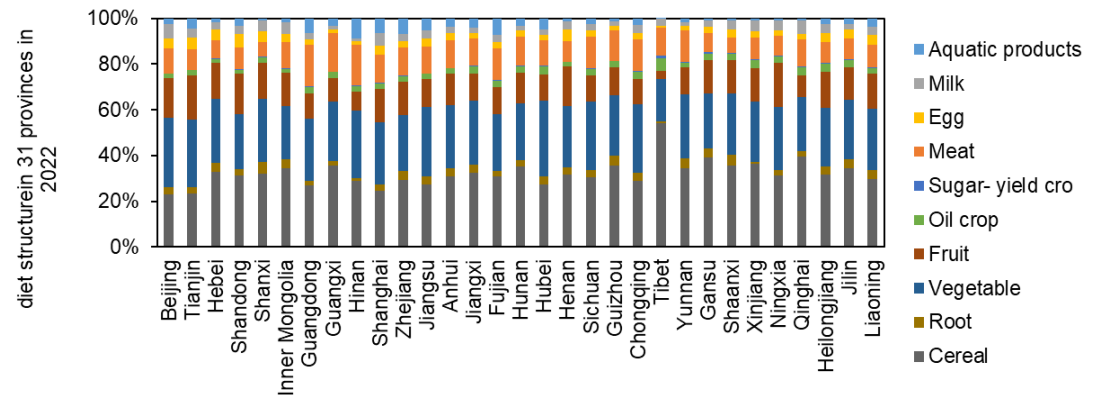

Fig. S8 Dietary structure of 31 provinces in China in 2022

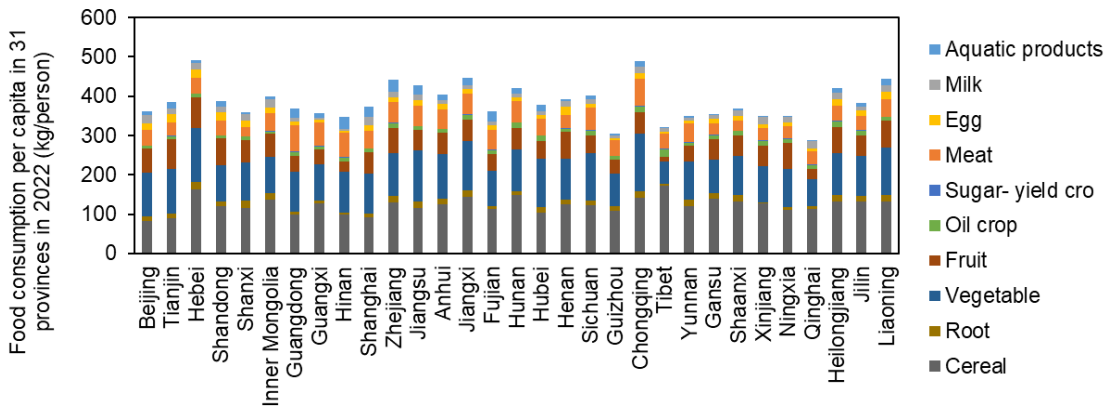

Fig. S9 Food consumption of 31 provinces in China in 2022



## S2. MATERIALS AND METHODS

### S2.1 Framework for mapping China's K cycle

The Fig. S10 is shown the framework to quantify the flows and stocks of K along its cycle in mainland China during the period 1990-2022. The K cycle can be divided into four dominating stages: production, fabrication and manufacturing, use, and residue management and reuse.

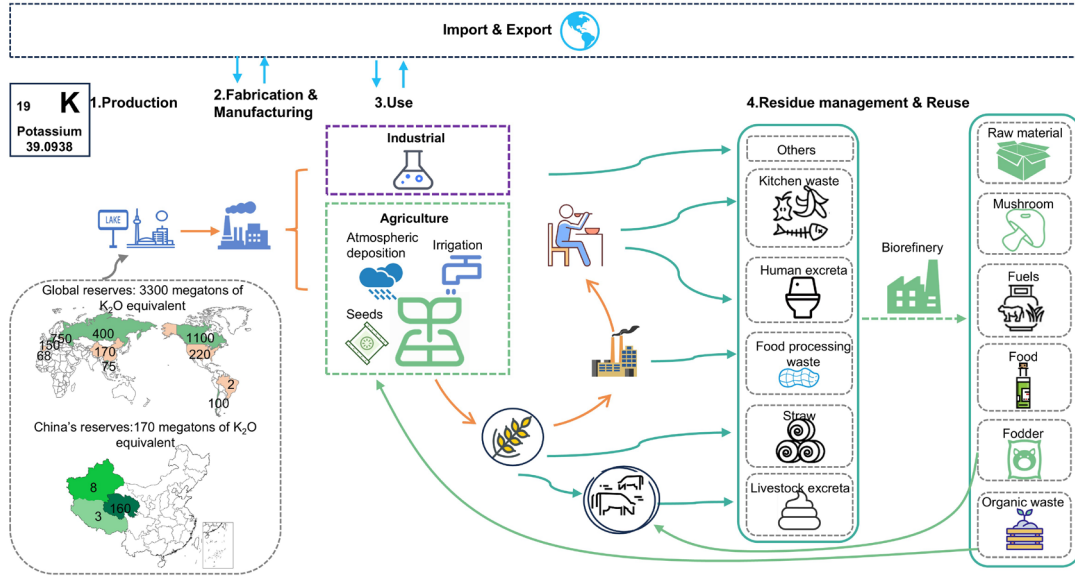

Fig. S10 Framework for mapping China's K cycle

### S2.2 K demand

#### S2.2.1 K demand of industrial subsystem

Industrial grain refers to cereals used for the production of products such as liquor, beer, alcohol, and starch. According to the National Bureau of Statistics and related studies, the per capita consumption of industrial grain in 2022 was 69.1 kg/person. The average annual growth rate of per capita industrial grain demand is approximately 0.75%. By 2050, as China is expected to complete its industrialization, the annual growth rate will stabilize at 0%<sup>3</sup>. The K demand of industrial grain is calculated as follows by Eq. (1):

$$F_{GI, inflow} = C_{cc} * P_{HM}(t) * C_{crop,1} \quad (1)$$

Where  $F_{GI, inflow}$  is the K demand of industrial grain,  $C_{cc}$  refers industrial grain demand,  $C_{crop,1}$

refers the K content in grain crops, and  $P_{HM}(t)$  is the population.

### S2.2.2 K demand of other subsystems

The calculation method for potassium demand in cotton and tobacco is as follows:

$$F_{IC,inflow} = C_{co} * C_{crop,8} + C_{to} * C_{crop,9} \quad (2)$$

Where  $F_{IC,inflow}$  is the K demand of cotton and tobacco,  $C_{co}$  and  $C_{to}$  refer cotton and tobacco demand, respectively.  $C_{crop,8}$  and  $C_{crop,9}$  are the K content in cotton and tobacco, respectively.

### S2.3 K residues generation prediction and reusing model

#### (1) Crop farming system

The K generation of straw, and leaching and runoff can be calculated by Eq. (3)-(4).

$$W_{1,1}(t) = \sum_i^i P_{c,i}(t) \times R_{GS,i}(t) \times C_{CS,i}(t) \quad (3)$$

$$W_{1,2}(t) = L_{C,L}(t) \times LL_{C,L}(t) \quad (4)$$

Where  $W_{1,1}(t)$  refers the straw K generation;  $P_{c,i}(t)$  represents the crops demand,  $R_{GS,i}(t)$  refers to the grain-straw ratio,  $C_{CS,i}(t)$  refers to the straw K content,  $i$  represents the crop species ( $i=1, 2, 3, \dots, 9$ ).  $W_{1,2}(t)$  refers K loss to environment form leaching and runoff,  $L_{C,L}(t)$  is the national cultivated land;  $LL_{C,L}(t)$  is K loss of yield per unit cultivated area.

#### (2) Resident consumption system

K generation of resident excrement and kitchen waste can be calculated by Eq. (5)-(7)

$$W_{2,1}(t) = \sum_i P_{HM}(t) * RU_{HM}(t) * (G_{HME}(t) * C_{HME}(t) + G_{HMU}(t) * C_{HMU}(t)) * 365 \quad (5)$$

$$W_{2,2}(t) = \sum_i P_{HM}(t) * (1 - RU_{HM}(t)) * (G_{HME}(t) * C_{HME}(t) + G_{HMU}(t) * C_{HMU}(t)) * 365 \quad (6)$$

$$W_{2,3}(t) = \sum_i P_{HM}(t) * AV_{KW}(t) * R_{KW}(t) * C_{KW}(t) \quad (7)$$

Where  $W_{2,1}(t)$  and  $W_{2,2}(t)$  are the urban residents excrement K generation and rural residents excrement K generation, respectively.  $P_{HM}(t)$  refers the population,  $RU_{HM}(t)$  refers urbanization

rate,  $G_{HME}(t)$  and  $C_{HME}(t)$  refer the daily manure and manure K content;  $G_{HMU}(t)$  and  $C_{HMU}(t)$  refer the daily urine and urine K content.  $W_{2,3}(t)$  is the kitchen waste K generation,  $G_{KW}(t)$  is the household waste discharged to the environment,  $R_{HW}(t)$  is the proportion of kitchen waste,  $C_{KW}(t)$  is the K content in the kitchen waste.

### **(3) Animal husbandry system**

K generation of livestock excrement can be calculated by Eq. (8)

$$W_{3,1}(t) = F_{AM,inf\text{low}} \quad (8)$$

Where  $W_{3,1}(t)$  is K generation of livestock excrement,  $F_{AM,inf\text{low}}$  is the K demand for animal-based foods.

### **(4) Food processing system**

K generation of food processing waste can be calculated by Eq. (9)

$$W_{4,1}(t) = \sum_1^j D_{FP,j}(t) * R_{FP,j}(t) * KC_{FP,j}(t) \quad (9)$$

Where  $W_{4,1}(t)$  is the food processing waste K generation,  $D_{FP,j}(t)$  is the crops demand;  $R_{FP,j}(t)$  refers the ratio of food processing,  $KC_{FP,j}(t)$  is the K content in the food processing waste,  $j$  represents the form of by-products ( $j=1, 2, 3, \dots, 4$ ).

### **(5) Industry system**

Other chemical products can be calculated by Eq. (10)

$$W_{5,1}(t) = C_{OC}(t) \quad (10)$$

Where  $W_{5,1}(t)$  is other chemical products discharged to the environment,  $C_{OC}(t)$  is the consumption of other chemical products.

## S2.4 Potash Supply Forecasting Model

The Hubbert supply curve, proposed by Hubbert in 1956 in response to the issue of oil supply<sup>4-6</sup>, is based on the growth factor and the recoverable resource reserves. The curve has since been applied to the supply studies of various minerals, including copper<sup>7</sup>, lithium<sup>7</sup>, iron<sup>7</sup>, aluminum<sup>7</sup>, zinc<sup>7</sup>, manganese<sup>7</sup>, and potash<sup>4</sup>.

Ultimate recoverable resource is a key factor influencing the accuracy of the model. The ultimate recoverable resource include both historical cumulative production and reserves in 2023<sup>4,8</sup>. The historical cumulative production is 83.868 mt from 1961 to 2022, and the potash reserve in 2023 is 170 mt.

Table S2. Potash supply scenarios

| Scenario setting | Description                                                                                                                                                      |
|------------------|------------------------------------------------------------------------------------------------------------------------------------------------------------------|
| High scenario    | The ultimate recoverable resource includes the cumulative production from 1961 to 2022 and a potash reserve that is 2.0 times the present (2023) potash reserve. |
| Medium scenario  | The ultimate recoverable resource includes the cumulative production from 1961 to 2022 and a potash reserve that is 1.5 times the present (2023) potash reserve. |
| Low scenario     | The ultimate recoverable resource includes the cumulative production from 1961 to 2022 and the present (2023) potash reserve.                                    |

## S2.5 Data sources

Table S3. Data sources

| Products                             | Data sources                                                                                            |
|--------------------------------------|---------------------------------------------------------------------------------------------------------|
| K <sub>2</sub> O production          | United States Geological Survey                                                                         |
| Global K <sub>2</sub> O reserve      | United States Geological Survey                                                                         |
| China's K <sub>2</sub> O reserve     | Statistical table of National mineral resources and reserves in 2021<br>(Ministry of Natural Resources) |
| Mineral K fertilizer production      | Food and Agriculture Organization of the United Nations                                                 |
| Mineral fertilizer consumption       | Food and Agriculture Organization of the United Nations                                                 |
| Import and export trade              | UN Comtrade                                                                                             |
| Crop production                      | Food and Agriculture Organization of the United Nations, State Statistics Bureau                        |
| Per capita food consumption          | State Statistics Bureau                                                                                 |
| Urban and rural population           | State Statistics Bureau                                                                                 |
| Arable land area in 31 provinces     | China Rural Statistical Yearbook                                                                        |
| Kitchen waste                        | State Statistics Bureau                                                                                 |
| GDP per capita (2015 constant US \$) | The World Bank                                                                                          |

## S3. Key parameters

### S3.1 Population, per capita GDP, urbanization rate

Table S4. Population, per capita GDP, urbanization rate of 31 provinces in 2050

| 2050              | BAU scenario                                                     |                             |                       | DA scenario                                                      |                             |                       |
|-------------------|------------------------------------------------------------------|-----------------------------|-----------------------|------------------------------------------------------------------|-----------------------------|-----------------------|
|                   | GDP per capita<br>(10 <sup>3</sup> CNY (2010<br>constant price)) | Populatio<br>n<br>(million) | Urbanizatio<br>n rate | GDP per capita<br>(10 <sup>3</sup> CNY (2010<br>constant price)) | Populatio<br>n<br>(million) | Urbanizatio<br>n rate |
| Beijing           | 167.6                                                            | 23.67                       | 97.80%                | 153.6                                                            | 24.18                       | 97.80%                |
| Tianjin           | 271.2                                                            | 14.12                       | 94.20%                | 267.0                                                            | 14.49                       | 94.20%                |
| Hebei             | 134.3                                                            | 72.21                       | 77.40%                | 124.3                                                            | 76.79                       | 73.30%                |
| Shanxi            | 78.0                                                             | 34.39                       | 75.60%                | 71.6                                                             | 36.04                       | 72.10%                |
| Inner<br>Mongolia | 170.5                                                            | 23.32                       | 83.40%                | 160.3                                                            | 24.14                       | 80.40%                |
| Liaoning          | 178.2                                                            | 34.42                       | 82.00%                | 185.6                                                            | 34.53                       | 79.70%                |
| Jilin             | 133.9                                                            | 21.44                       | 63.40%                | 134.2                                                            | 21.96                       | 62.80%                |
| Heilongjian<br>g  | 88.5                                                             | 29.43                       | 68.30%                | 82.0                                                             | 29.59                       | 67.10%                |
| Shanghai          | 248.1                                                            | 27.65                       | 95.70%                | 247.8                                                            | 28.13                       | 95.70%                |
| Jiangsu           | 274.4                                                            | 76.74                       | 88.60%                | 266.9                                                            | 77.11                       | 79.20%                |
| Zhejiang          | 271.0                                                            | 62.58                       | 85.90%                | 245.1                                                            | 64.77                       | 82.50%                |
| Anhui             | 104.6                                                            | 55.17                       | 76.30%                | 93.7                                                             | 59.32                       | 72.40%                |
| Fujian            | 212.1                                                            | 39.77                       | 85.80%                | 200.1                                                            | 41.70                       | 82.20%                |
| Jiangxi           | 93.0                                                             | 44.17                       | 76.60%                | 81.6                                                             | 47.44                       | 72.70%                |
| Shandong          | 299.1                                                            | 89.27                       | 74.20%                | 281.9                                                            | 93.39                       | 71.10%                |
| Henan             | 162.4                                                            | 92.00                       | 75.70%                | 167.0                                                            | 98.40                       | 71.90%                |
| Hubei             | 151.5                                                            | 52.69                       | 73.60%                | 139.8                                                            | 55.66                       | 70.70%                |
| Hunan             | 122.1                                                            | 61.90                       | 75.70%                | 107.1                                                            | 66.11                       | 72.10%                |
| Guangdong         | 152.3                                                            | 133.68                      | 84.20%                | 125.9                                                            | 140.74                      | 81.50%                |
| Guangxi           | 52.3                                                             | 53.06                       | 72.90%                | 43.7                                                             | 58.57                       | 69.80%                |
| Hinan             | 94.6                                                             | 10.66                       | 74.80%                | 86.0                                                             | 11.55                       | 71.60%                |
| Chongqing         | 124.1                                                            | 24.79                       | 88.10%                | 116.0                                                            | 26.01                       | 83.80%                |
| Sichuan           | 120.6                                                            | 66.09                       | 74.40%                | 113.9                                                            | 68.96                       | 70.90%                |
| Guizhou           | 40.3                                                             | 38.65                       | 67.00%                | 34.2                                                             | 42.98                       | 64.60%                |
| Yunnan            | 65.7                                                             | 48.27                       | 73.10%                | 57.1                                                             | 52.07                       | 69.80%                |
| Tibet             | 59.0                                                             | 3.15                        | 45.60%                | 52.6                                                             | 3.34                        | 45.60%                |
| Shaanxi           | 121.3                                                            | 34.28                       | 76.10%                | 112.3                                                            | 35.72                       | 72.40%                |
| Gansu             | 80.0                                                             | 25.04                       | 71.70%                | 73.8                                                             | 26.70                       | 68.70%                |
| Qinghai           | 85.5                                                             | 6.12                        | 70.10%                | 76.3                                                             | 6.58                        | 67.70%                |
| Ningxia           | 112.3                                                            | 7.15                        | 76.10%                | 94.8                                                             | 7.70                        | 72.40%                |
| Xinjiang          | 77.8                                                             | 27.37                       | 65.60%                | 76.0                                                             | 29.72                       | 63.90%                |

Reference: <sup>9,10</sup>

### S3.2 Animal-based foods consumption and GDP per capita

Table S5. Animal-based foods consumption and GDP per capita during peak period

| Animal-based foods             | Pork    | Beef      | Mutton  | Poultry   | Eggs      |
|--------------------------------|---------|-----------|---------|-----------|-----------|
| Peak consumption (kg/person)   | 52.5    | 9.5       | 5.15    | 22.0      | 31.5      |
| peak per capita GDP/10,000 CNY | 12~12.5 | 14.0~15.0 | 14~14.5 | 13.2~13.7 | 12.1~12.6 |

Reference: <sup>11</sup>

Table S6. Animal-based foods consumption and GDP per capita during peak period in this study

under the BAU scenario

| Animal-based foods             | Pork  | Beef  | Mutton | Poultry | Eggs  | Milks |
|--------------------------------|-------|-------|--------|---------|-------|-------|
| Peak consumption (kg/person)   | 52.5  | 9.5   | 5.15   | 22.0    | 31.5  | 69.0  |
| peak per capita GDP/10,000 CNY | 10~15 | 15~20 | 15~20  | 12~15   | 15~20 | 12~15 |

### S3.3 Feed conversion ratio

Table S7. Feed conversion ratio

| Animal-based foods | Conversion coefficient of feed grain | Animal-based foods | Conversion coefficient of feed grain |
|--------------------|--------------------------------------|--------------------|--------------------------------------|
| Pork               | 2.76~2.80                            | Eggs               | 1.7~2.19                             |
| Beef               | 1.0~1.95                             | Milks              | 0.3~0.37                             |
| Mutton             | 1.0~1.95                             | Aquatic products   | 0.9~1.06                             |
| Poultry            | 2.0~2.22                             |                    |                                      |

Reference: <sup>12,13</sup>

### S3.4 Harvested crop K for unit of economic yield of different crops

K in harvested crop is the amount of K contained in the plant material that has been removed from a particular area<sup>14</sup>. When total K accumulation in harvested crop organs increases, the rate of K removal per unit area increases.

Table S8. Harvested crop K for unit of economic yield of different crops

| Crops               | Crops Content<br>(Kg K <sub>2</sub> O t <sup>-1</sup> ) |
|---------------------|---------------------------------------------------------|
| Grain               | 23.39                                                   |
| Oil crop            | 31.49                                                   |
| Root                | 13.19                                                   |
| Fruit               | 10.81                                                   |
| Vegetable           | 4.85                                                    |
| tobacco             | 75.65                                                   |
| Cotton              | 60.03                                                   |
| Sugar-yielding crop | 43.27                                                   |

Data source:<sup>15-17</sup>

### S3.5 Coefficients for straw collection and K content

Table S9. Coefficients for straw collection and K content

| Major Category        | Crop | Crop Subcategory        | Grain-straw ratio | K content (K <sub>2</sub> O equivalence) | Collection efficiencies |
|-----------------------|------|-------------------------|-------------------|------------------------------------------|-------------------------|
| Cereals               |      |                         | 1.10              | 1.26%                                    | 0.86                    |
| Fruits and vegetables |      | Fruits                  | 0.14              | 2.61%                                    | 0.55                    |
|                       |      | Vegetables              | 0.10              | 2.99%                                    | 0.55                    |
| Oil crop              |      |                         | 1.84              | 1.61%                                    | 0.74                    |
| Root                  |      |                         | 0.54              | 1.16%                                    | 0.73                    |
|                       |      | Sugarcane and Sugarbeet | 0.24              | 1.01%                                    | 0.96                    |
| Industrial crop       |      | Cotton                  | 2.47              | 1.02%                                    | 0.86                    |
|                       |      | Tobacco                 | 1.60              | 3.00%                                    | 0.95                    |

Data source: reference<sup>16,17</sup>



### S3.6 Product category and trade

Table S10. International Convention for Harmonized Commodity Description and Coding System

(HS) code of K-related products

| Commodity code in HS | Product description                                   | Content (K <sub>2</sub> O) | Data source |
|----------------------|-------------------------------------------------------|----------------------------|-------------|
| 310410               | Carnallite, sylvite, crude potassium salts nes, >10kg |                            | 18          |
| 310420               | Potassium chloride, in packs >10 kg                   | 60%                        | 18,19       |
| 310430               | Potassium sulphate, in packs >10 kg                   | 49%                        | 18,19       |
| 310490               | Potassic fertilizers, mixes, nes, pack >10 kg         | 14%                        | 20          |
| 310510               | Fertilizer mixes in tablets etc or in packs <10 kg    | 6%                         | 18,19       |
| 310520               | Nitrogen-phosphorus-potassium fertilizers, pack >10kg | 6%                         | 18,19       |
| 310560               | Fertilizers containing phosphorus & potassium, <=10kg | 6%                         | 18,19       |
| 281520               | Potassium hydroxide (caustic potash)                  | 83%                        | 19          |
| 281530               | Peroxides of sodium or potassium                      | 83%                        | 19          |
| 282919               | Chlorates of metals except sodium                     | 0.384                      |             |
| 283330               | Alums                                                 | 0.115                      |             |
| 283421               | Potassium nitrate                                     | 39%                        | 19          |
| 283524               | Potassium phosphates                                  | 34%                        | 19          |
| 283640               | Potassium carbonates                                  | 0.69                       |             |

Table S11. International Convention for Harmonized Commodity Description and Coding System

(HS) code of grain

| Commodity code<br>in HS | Product description                                   |
|-------------------------|-------------------------------------------------------|
| 1001                    | Wheat and meslin                                      |
| 1002                    | Rye                                                   |
| 1003                    | Barley                                                |
| 1004                    | Oats                                                  |
| 1005                    | Maize (corn)                                          |
| 100610                  | Rice in the husk (paddy or rough)                     |
| 1007                    | Grain sorghum                                         |
| 1008                    | Buckwheat, millet and canary seed, other cereals      |
| 0701                    | Potatoes, fresh or chilled                            |
| 0713                    | Vegetables, leguminous dried, shelled                 |
| 0714                    | Manioc, arrowroot, salep etc, fresh, dried, sago pith |
| 1201                    | Soya beans                                            |

## S4. Supplement results

### S4.1 Supply chain of China's K cycles in 2022

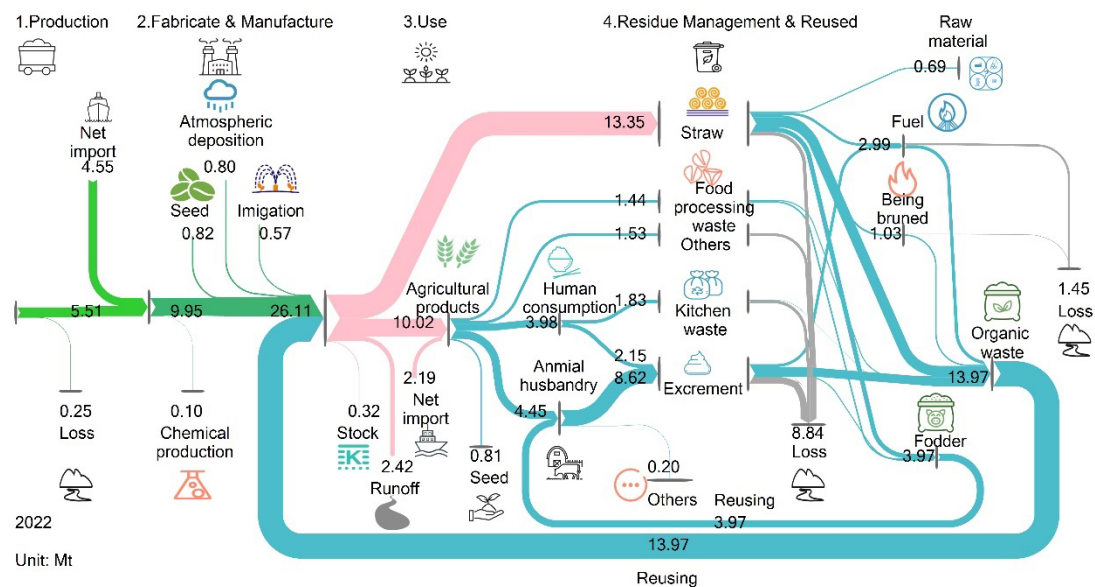

Fig. S11 Supply chain of China's K cycles in 2022

## S4.2 Temporal and Spatial of Mineral K Fertilizer consumption in China

At the provincial level, compared with 1990, mineral K fertilizer consumption in all 31 provinces of China increased significantly by 2010. Provinces with the most substantial growth included Ningxia, Inner Mongolia, Heilongjiang, Gansu, Xinjiang, Liaoning, and Henan, with consumption reaching 40.0kt, 26.5 kt, 56.0 kt, 111.0 kt, 18.7kt, 22.3 kt, and 1.121 mt, respectively, in 2010, approximately 21.8-fold, 20.8-fold, 12.8-fold, 12.2-fold, 11.4-fold, 11.1-fold, and 10.3 t-fold compared with 1990. All seven provinces are located in northern China. Notably, mineral K fertilizer consumption in 2022 decreased by 15.9% compared to 2010. However, Xinjiang, Ningxia, Gansu, Yunnan, Inner Mongolia, and Heilongjiang still experienced growth, approximately 2.2-fold, 1.2-fold, 1.2-fold, 1.2-fold, 1.1-fold, and 1.1 -fold compared with 2010, respectively. The remaining 25 provinces showed a declining trend.

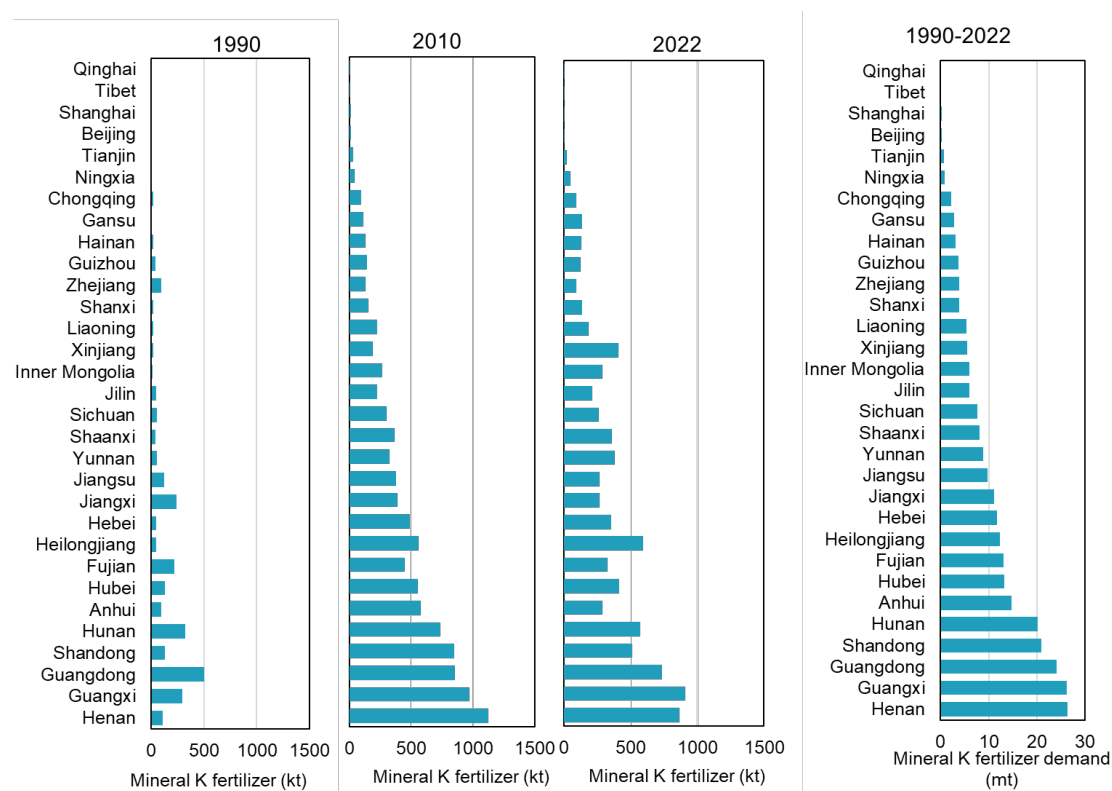

Fig. S12 Mineral K fertilizer consumption in 31 provinces in 1990, 2010, and 2022, and the cumulative consumption in China from 1990 to 2022

### S4.3 Demand for plant-based foods during 2023-2050

Grain demand exhibits a gradual downward trend, projected to reach 240 mt/ year by 2050. In contrast, the demand for roots, fruits, and vegetables is expected to increase, reaching 64.86 mt/ year, 200 mt/ year, and 660 mt/ year, respectively, by 2050. The cumulative demand is estimated at 7.07 billion tonnes for grains, 1.49 billion tonnes for roots, 4.97 billion tonnes for fruits, and 18.40 billion tonnes for vegetables during 2023-2050.

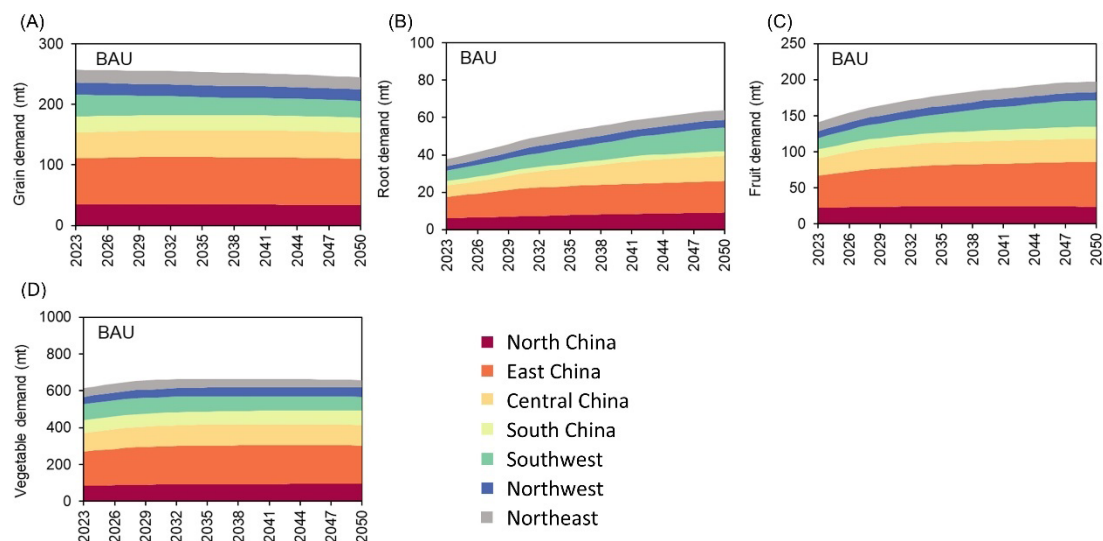

Fig. S13 Demand for plant-based foods during 2023-2050 under the BAU scenario

Grain demand exhibits a gradual downward trend, projected to reach 210 mt/ year by 2050. The cumulative demand is estimated at 6.57 billion tonnes for grains, 1.72 billion tonnes for roots, 5.57 billion tonnes for fruits, and 20.97 billion tonnes for vegetables during 2023-2050.

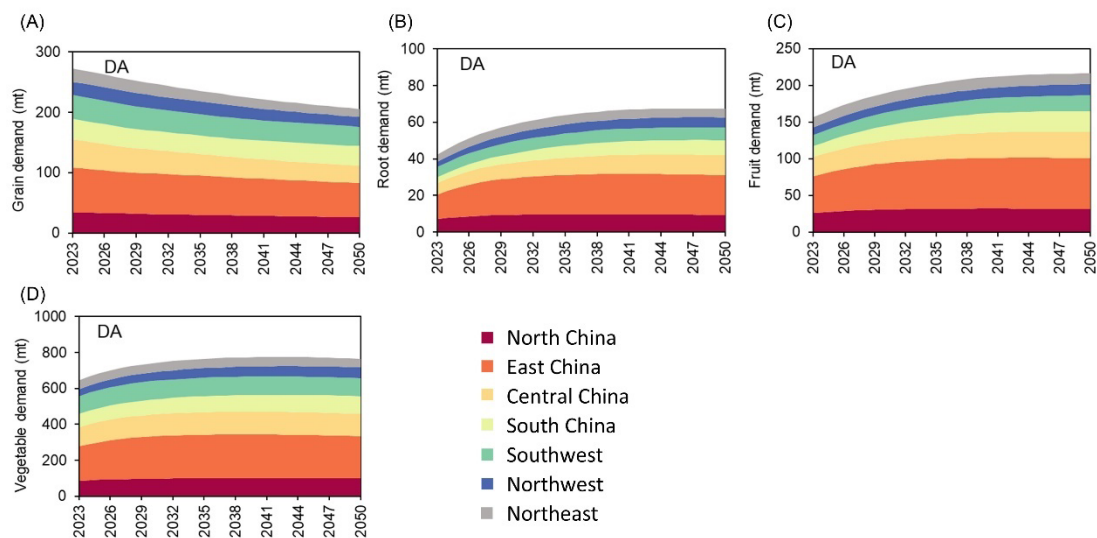

Fig. S14 Demand for plant-based foods during 2023-2050 under the DA scenario

#### S4.4 Demand for animal-based foods during 2023-2050

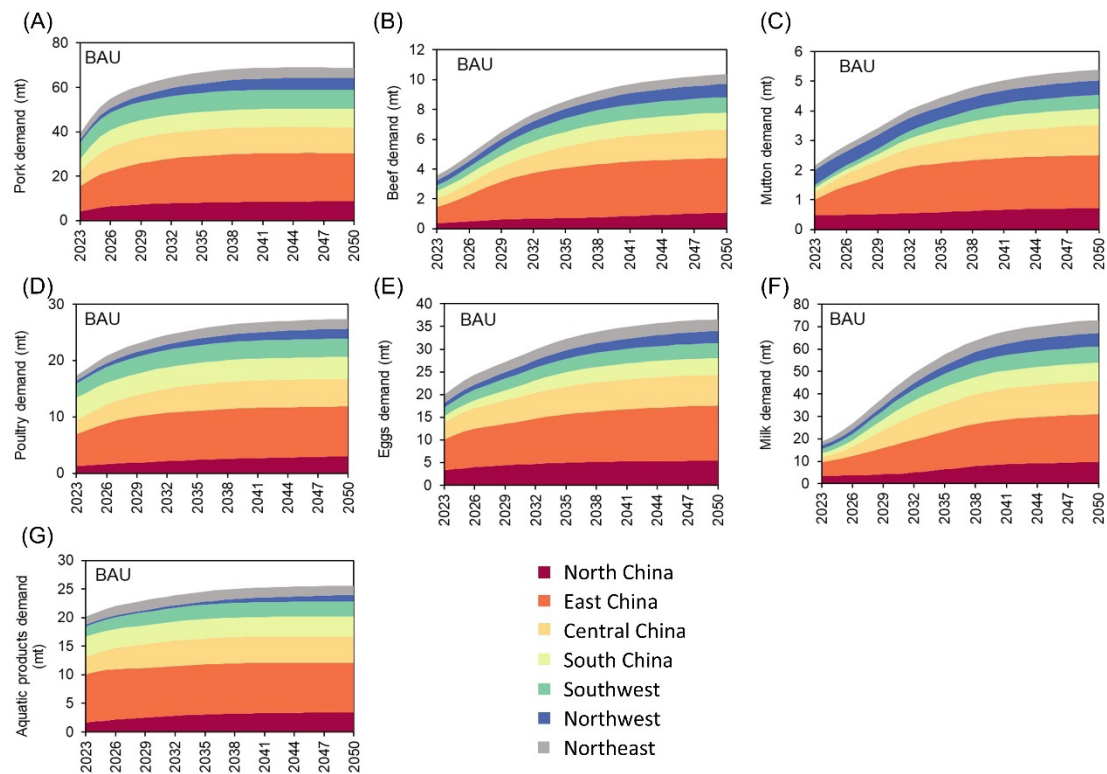

Fig. S15 Demand for animal-based foods during 2023-2050 under the BAU scenario

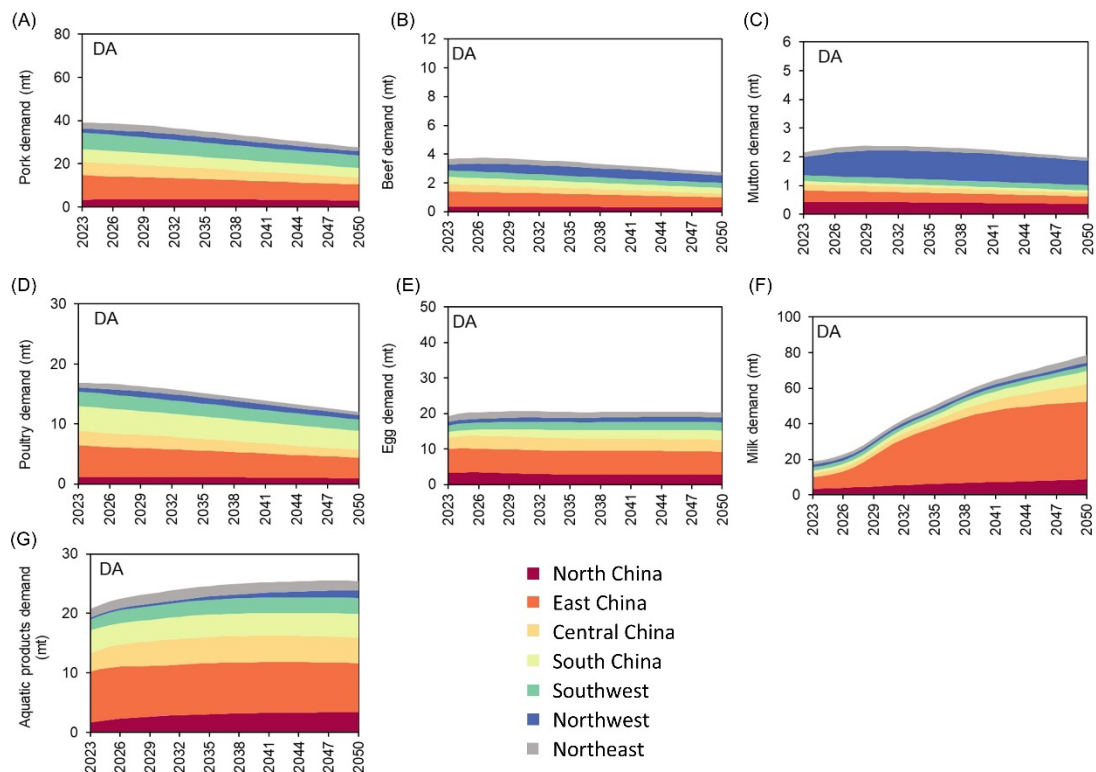

Fig. S16 Demand for animal-based foods during 2023-2050 under the DA scenario

#### S4.4 K Demand in 2050

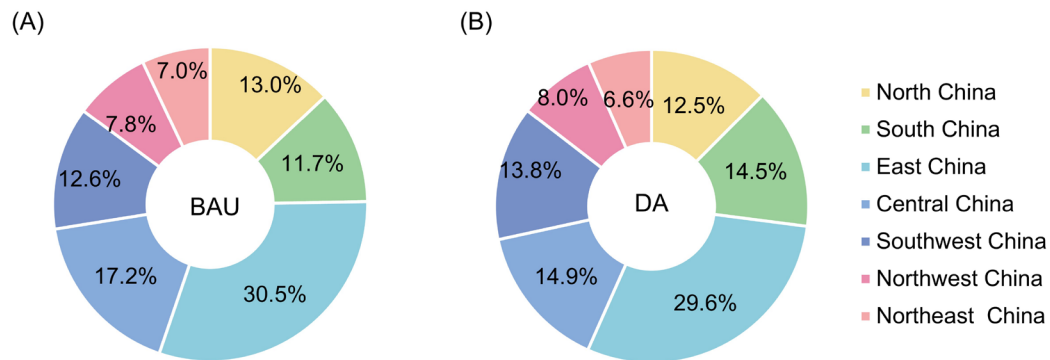

Fig S17 K Demand in 2050 under the BAU and DA scenarios

#### S4.5 K residues generation

##### (1) Crop farming subsystem K residues generation during 2023-2050

The total K residues generation by the crop farming system rises from 13.9Mt in 2023 to 18.0Mt in 2050 under the BAU scenario. The total cumulative K residues generation by crop farming system is 477.8 Mt during this period.

The total K residue generated by the crop farming system is projected to range from 13.3 Mt to 14.2 Mt between 2023 and 2050 under the DA scenario. The total cumulative K residues generation by crop farming system is 389.8 Mt during this period.

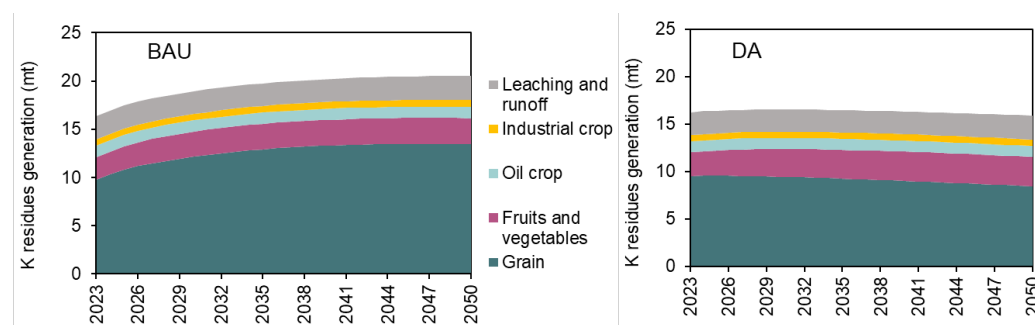

Fig. S18 Crop farming system K residues generation during 2023-2050 under the BAU and DA scenarios

##### (2) Total K residues generation during 2023-2050

The total K residues generation rises from 29.3Mt in 2023 to 40.4Mt in 2050 under the BAU scenario. The total cumulative K residues generation is 1051.7 Mt during this period.

The total K residue generated by the crop farming system is projected to range from 28.4 Mt to 29.8 Mt between 2023 and 2050 under the DA scenario. The total cumulative K residues generation of crop farming system is 820.8 Mt during this period.

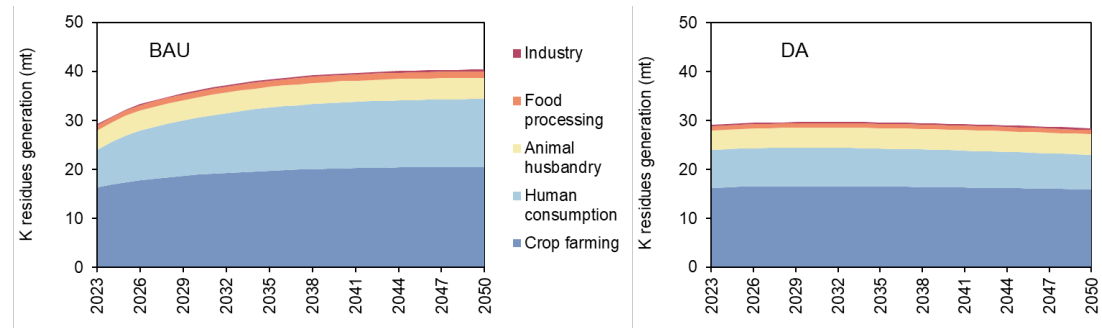

Fig. S19 K residues generation during 2023-2050 under the BAU and DA scenarios



#### S4.6 Potash supply potential

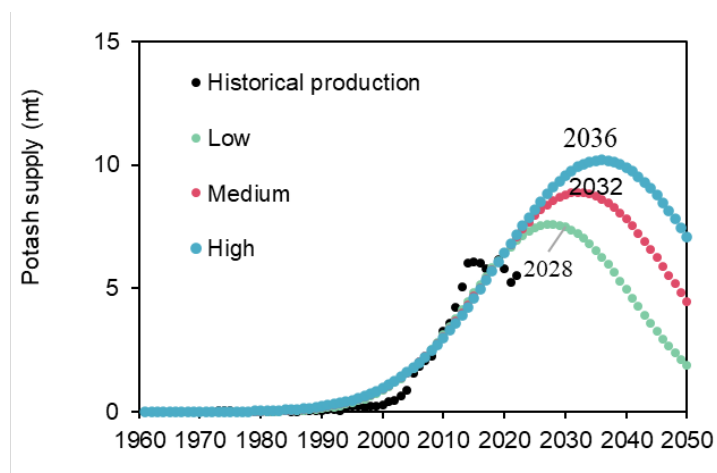

Fig. S20 Potash production during 1960-2022 and potash supply potential during 2023-2050

## S4.7 The Relationship Between Economic Development and Crop Yields

This study selects nine countries from three regions—North America (the United States and Canada), Europe (Germany, France, the United Kingdom, Italy, and the Netherlands), and Asia (Japan and South Korea)—and focuses on four major crop categories: cereals, soybeans, potatoes, and vegetables. The objective is to analyze the evolution of crop yield in relation to levels of economic development. The results reveal that crop yields in all three regions exhibit an S-shaped trajectory as economic development progresses.

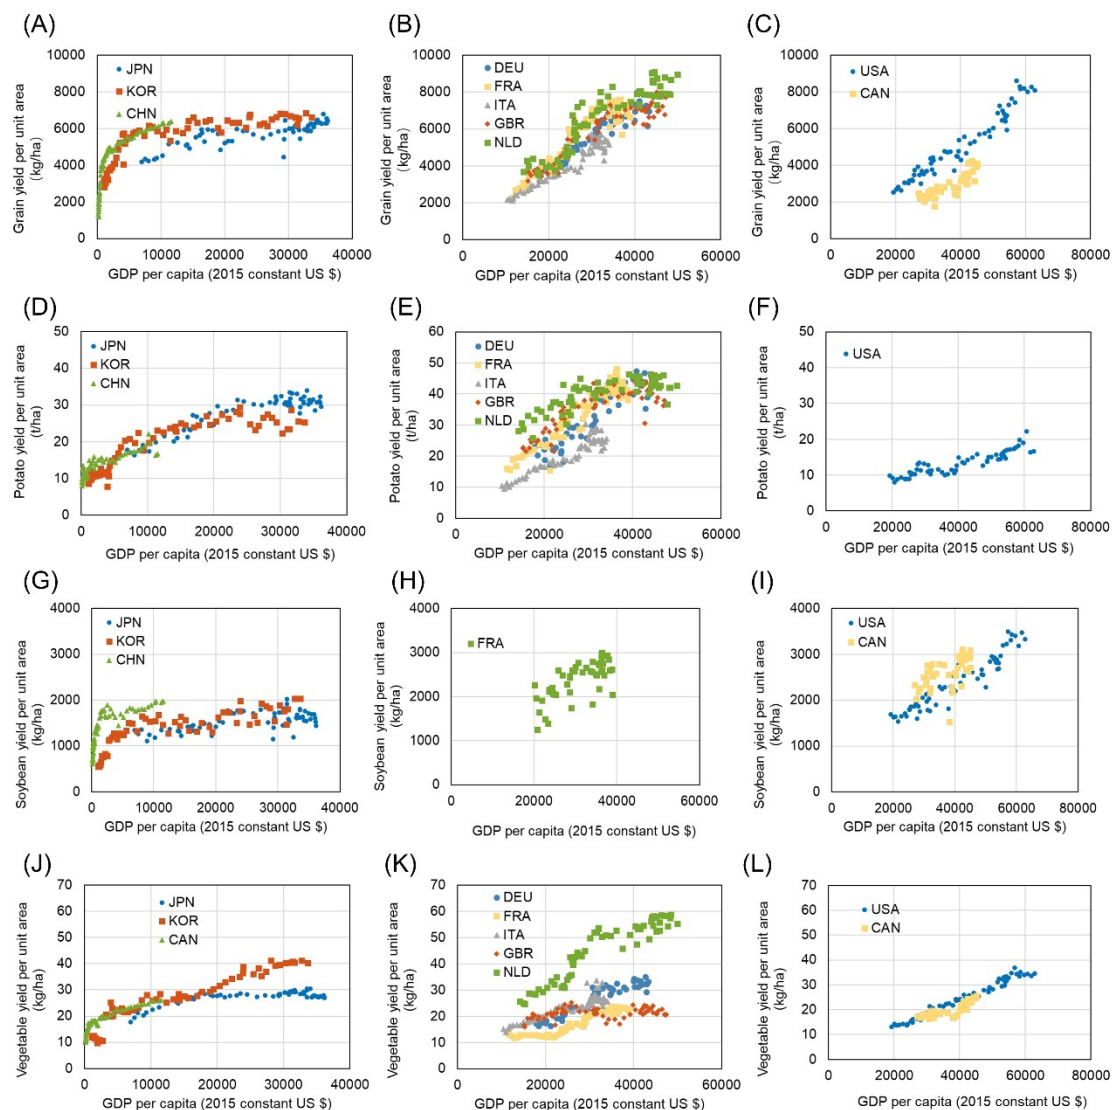

Fig. S21 The relationship between crop yield and per capita GDP between China and major developed countries

**S4.8 The proportion of chemical K products imported by source country in 2022**

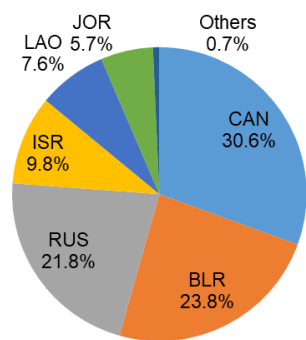

Fig. S22 The proportion of chemical K products imported by source country in 2022

**S4.9 The total soil K nutrient outflow**

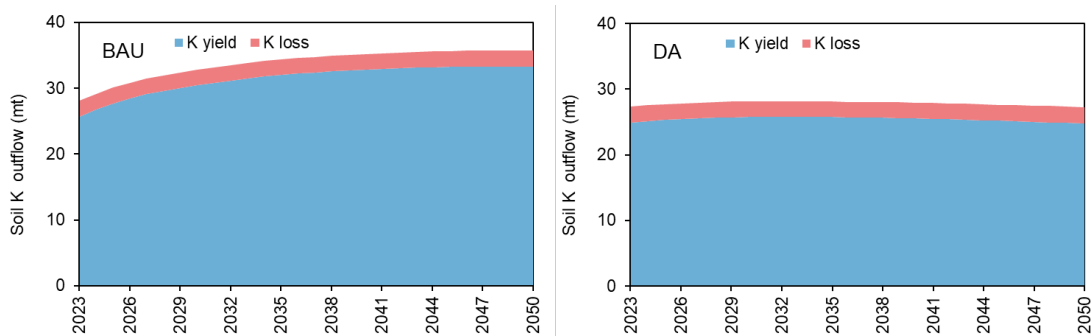

Fig. S23 The total soil K nutrient outflow under the BAU and DA scenarios

#### S4.10 Quantity of grain trade during 1990-2022

Since 2004, crop trade has been in a net import situation, with the net import volume continuing to grow. In 2022, the net import volume reached 150 million tons, accounting for 18.0% of total demand. The net import volume is 75.8 times that of 2004, primarily due to insufficient supply of feed grains. It is noteworthy that food demand continues to grow, reaching 1.0 billion tonnes (bt) by 2050 under the BAU scenario. The cumulative demand over the period 2023–2050 is projected to be 25.99 bt, which is 1.7 times the total consumption over the past 27 years (1995–2022).

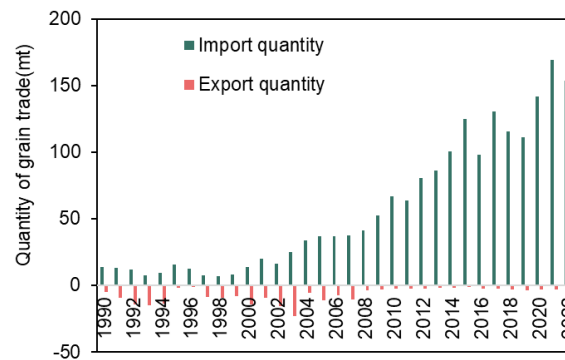

Fig. S24 Quantity of grain trade during 1990-2022

#### **S4.11 Evolution of Mineral Fertilizer Application**

Currently, analyses of mineral fertilizer consumption patterns mainly focus on indicators such as per capita mineral fertilizer consumption and mineral fertilizer application per unit of arable land. However, driven by improvements in mechanization and the implementation of 4R nutrient management, the crop yield has a more direct impact than population or arable land changes. This study therefore selects fertilizer application per unit of grain yield as the main research indicator. By conducting a comprehensive analysis of mineral fertilizer consumption data from 1961 to 2021 across major countries, this paper explores the relationship between mineral fertilizer use per unit of grain yield and per capita GDP.

Seven representative developed countries that have completed agricultural modernization were selected from three regions: Asia (South Korea, Japan), Europe (France, Italy, the United Kingdom, Germany), and North America (the United States). The analysis of historical mineral fertilizer application trajectories in these countries reveals an inverted U-shaped relationship between mineral fertilizer use per unit of grain yield and per capita GDP. Mineral fertilizer uses per unit of grain yield peaks when per capita GDP reaches approximately USD 15,000–25,000, and then gradually declines. Once per capita GDP surpasses USD 30,000, mineral fertilizer use per unit of grain yield tends to stabilize.

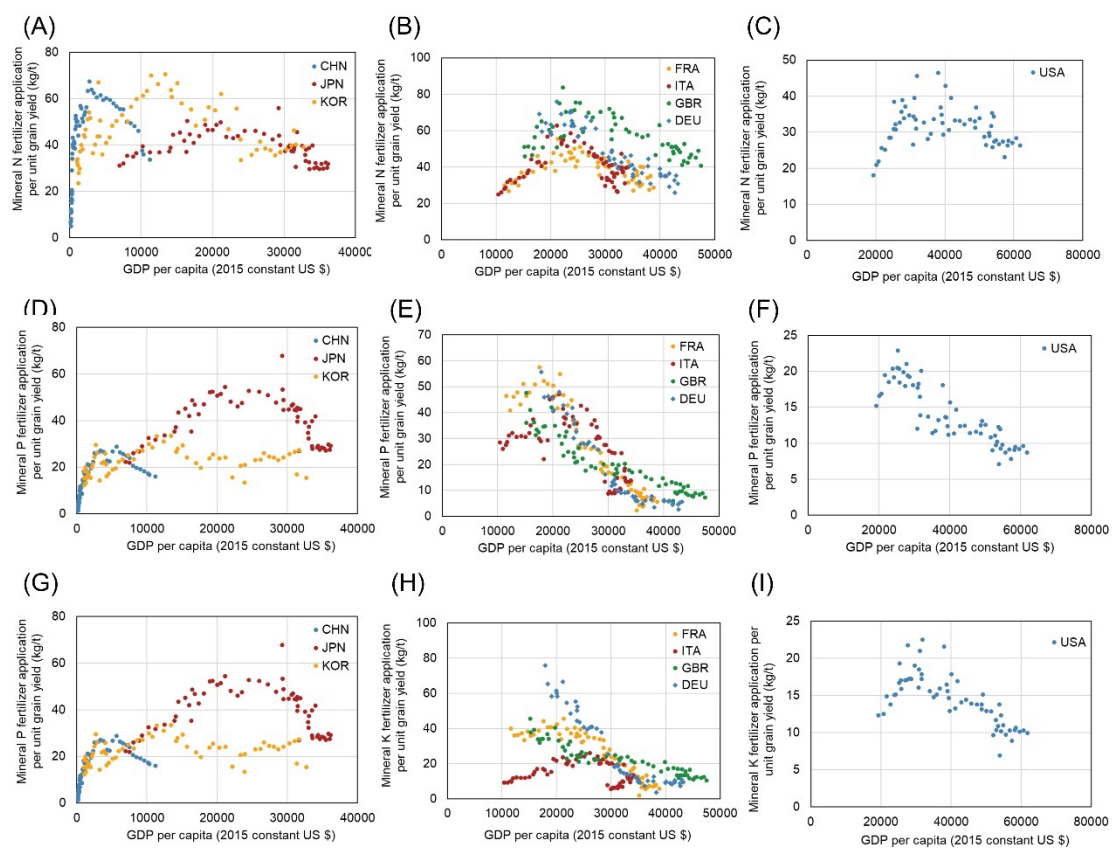

Fig. S25 Mineral fertilizer application, per capita GDP, and grain yield in major developed countries

## S4.12 Uncertainty analysis

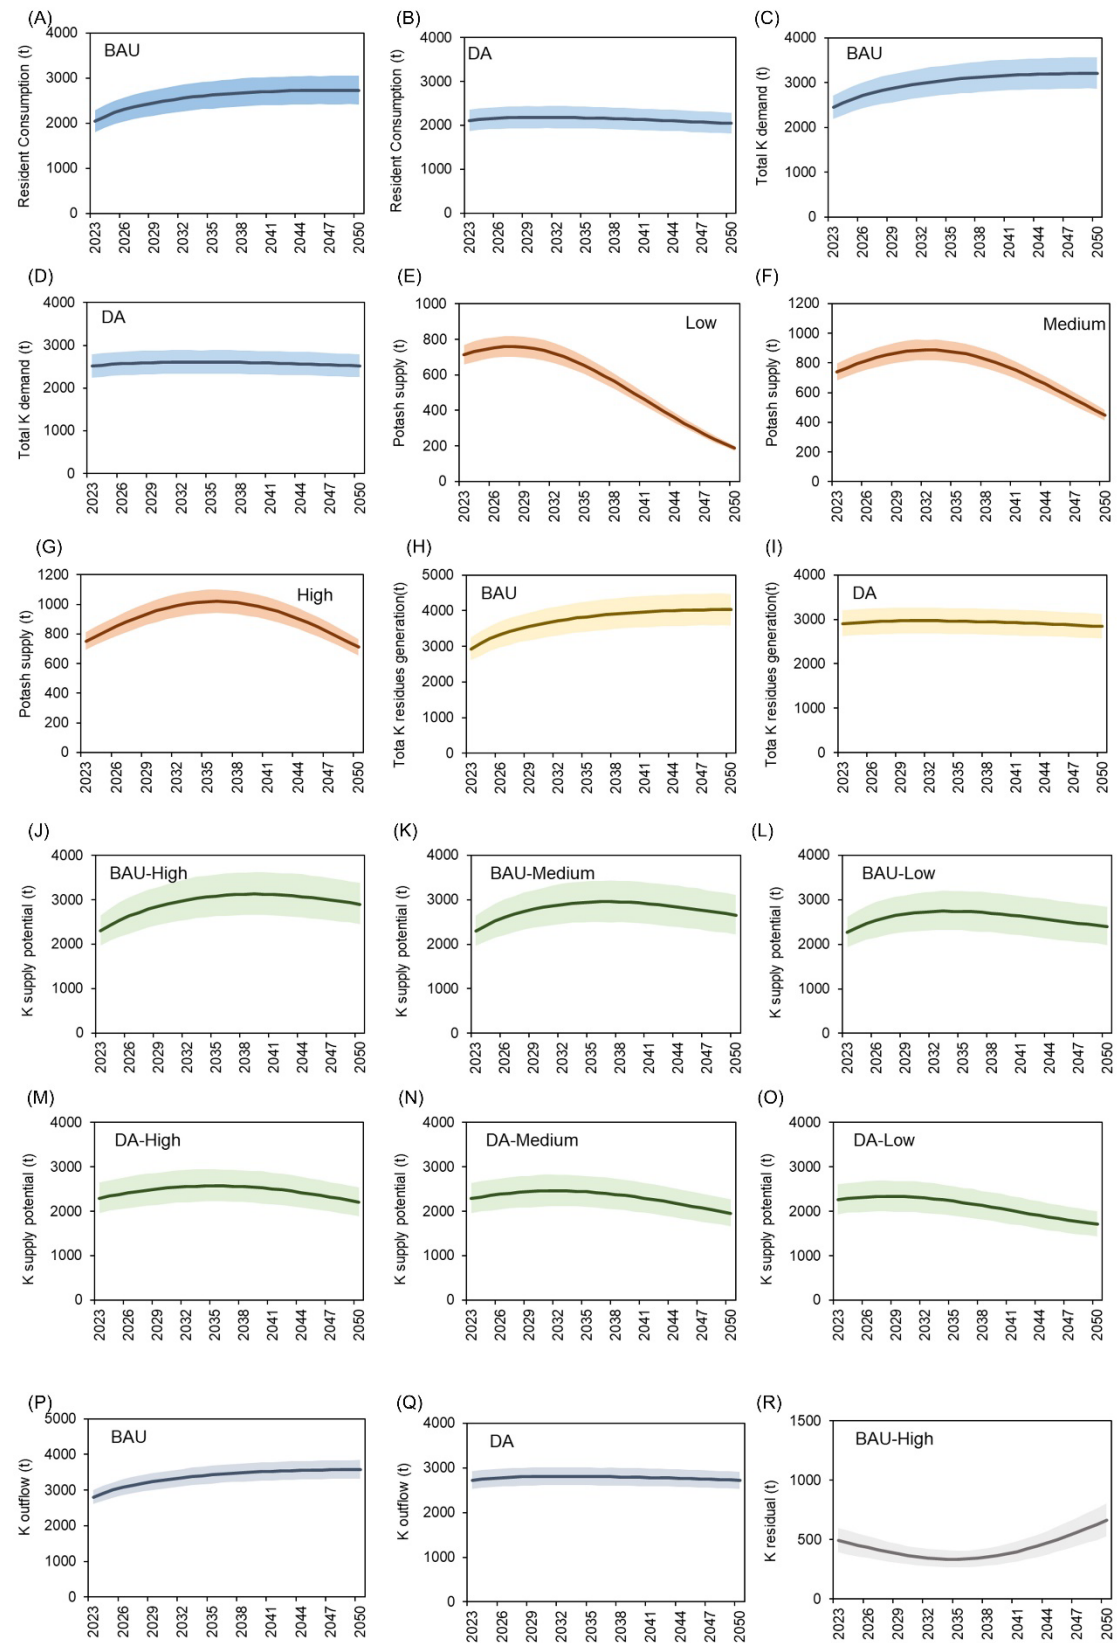

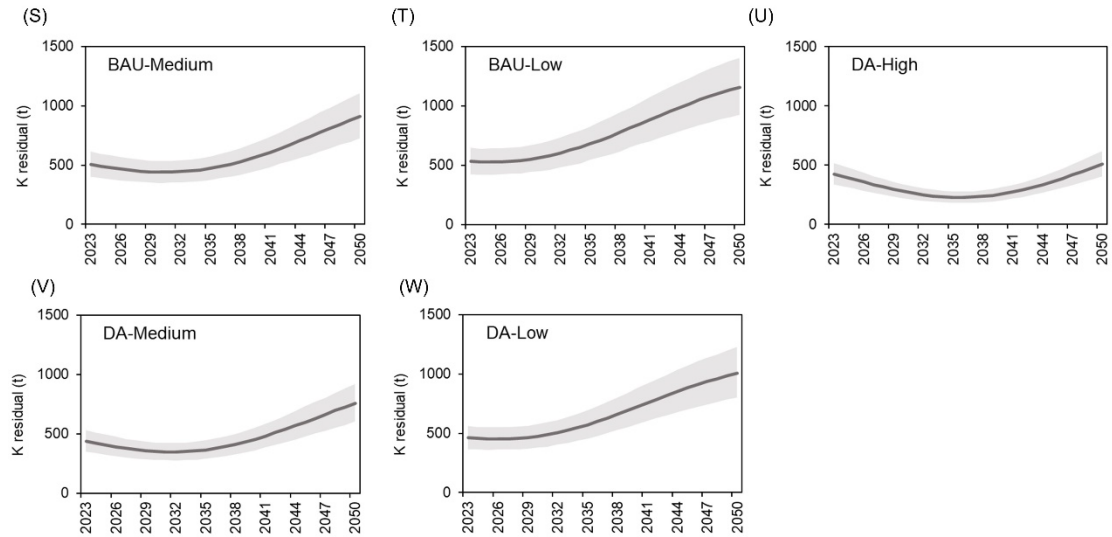

Fig. S26 Uncertainty analysis results of the flows of K in China during 2023-2050

(A-B) Residual consumption subsystem of K demand during 2023-2050 under the BAU and DA scenarios

(C-D) Total K demand during 2023-2050 under the BAU and DA scenarios

(E-G) Potash supply during 2023-2050 under the Low, Medium, and High scenarios

(H-I) Total K residue potential during 2023-2050 under the BAU and DA scenarios

(J-O) K supply potential during 2023-2050 under the BAU-High, BAU-Medium, BAU-Low, DA-High, DA-Medium, and DA-Low scenarios

(P-Q) Total K outflow during 2023-2050 under the BAU and DA scenarios

(R-W) K residual during 2023-2050 under the BAU-High, BAU-Medium, BAU-Low, DA-High, DA-Medium, and DA-Low scenarios



## References

1. Sun, H., Ren, J., Wang, J., Wu, X., and Tang, W. (2024). A review of the geological characteristics and resource potential analysis of potash deposits in Africa. *Journal of African Earth Sciences* 213. 10.1016/j.jafrearsci.2024.105226.
2. Kleine-Kleffmann, U. (2023). The discovery of the first potash mine and the development of the potash industry since 1861. *Journal of Plant Nutrition and Soil Science* 186, 615-622. 10.1002/jpln.202300382.
3. Yuneng, D., Youliang, X., Leiyong, Z., and Shufang, S. (2020). Can China's food production capability meet her peak food demand in the future? *International Food and Agribusiness Management Review* 23, 1-17. 10.22434/ifamr2018.0116.
4. Rawashdeh, A.R. (2020). World Peak Potash: An analytical study. *Resour. Policy*. 69. 10.1016/j.resourpol.2020.101834.
5. Tilton, J.E. (2018). The Hubbert peak model and assessing the threat of mineral depletion. *Resour, Conserv, Recycl.* 139, 280-286. 10.1016/j.resconrec.2018.08.026.
6. Al-Husseini, M. (2006). The debate over Hubbert's Peak: a review. *GeoArabia* 11, 181-210. 10.2113/geoarabia1102181.
7. Calvo, G., Valero, A., and Valero, A. (2017). Assessing maximum production peak and resource availability of non-fuel mineral resources: Analyzing the influence of extractable global resources. *Resour, Conserv, Recycl.* 125, 208-217. 10.1016/j.resconrec.2017.06.009.
8. Sanginesi, F., Millacci, G., Giaccherini, A., Bucciatti, A., Fusi, L., Di Benedetto, F., and Pardi, L. (2023). Long term lithium availability and electric mobility: What can we learn from resource assessment? *Journal of Geochemical Exploration* 249. 10.1016/j.gexplo.2023.107212.
9. Tong, J., Buda, S., Yanjun, W., Jinlong, H., Cheng, J., Miaoni, G., Guojie, W., Qigen, L., Shan, J., Shuci, L., and Yong, L. Gridded datasets for population and economy under Shared Socioeconomic Pathways. *Science Data Bank*.
10. Chen, Y., Guo, F., Wang, J., Cai, W., Wang, C., and Wang, K. (2020). Provincial and gridded population projection for China under shared socioeconomic pathways from 2010 to 2100. *Scientific Data* 7. 10.1038/s41597-020-0421-y.
11. Bai, Z., Ma, W., Ma, L., Velthof, G.L., Wei, Z., Havlík, P., Oenema, O., Lee, M.R.F., and Zhang, F. (2018). China's livestock transition: Driving forces, impacts, and consequences. *Science Advances* 4, eaar8534. doi:10.1126/sciadv.aar8534.
12. Liu, X., Dou, Y., Guan, D., He, G.J.D., and Wang, S. (2021). Forecasting China's Food Grain Demand 2021-2050 with Attention to Balanced Dietary and Fertility Policies. *SSRN Electronic Journal*. 10.21203/rs.3.rs-675464/v1.
13. Ding, X., Wu, Y., Zheng, B., Zhong, G., Song, X., Geng, Y., and Liu, J. (2024). Assessment of nitrogen, phosphorus and potassium flows in China's food system during 2010–2019: Implications for integrated management. *Resour, Conserv, Recycl.* 207. 10.1016/j.resconrec.2024.107652.
14. Brouder, S.M., Volenec, J.J., and Murrell, T.S. (2021). The Potassium Cycle and Its Relationship to Recommendation Development. held in Cham, 2021//. T.S. Murrell, R.L. Mikkelsen, G. Sulewski, R. Norton, and M.L. Thompson, eds. (Springer International Publishing), pp. 1-46.

15. Liu, Y., Ma, J., Ding, W., He, W., Lei, Q., Gao, Q., and He, P. (2017). Temporal and Spatial Variation of Potassium Balance in Agricultural Land at National and Regional Levels in China. *PLoS One* 12, e0184156. 10.1371/journal.pone.0184156.
16. Song, X., Geng, Y., Zhang, Y., Zhang, X., Gao, Z., and Li, M. (2022). Dynamic Potassium Flows Analysis in China for 2010–2019. *Resour. Policy*. 78. 10.1016/j.resourpol.2022.102803.
17. Zhuang, M., Zhang, J., Kong, Z., Fleming, R.M., Zhang, C., and Zhang, Z. (2020). Potential environmental benefits of substituting nitrogen and phosphorus fertilizer with usable crop straw in China during 2000–2017. *J. Cleaner Prod.* 267. 10.1016/j.jclepro.2020.122125.
18. Finch, H.J.S., Samuel, A.M., and Lane, G.P.F. (2014). Fertilisers and Manures. In Lockhart & Wiseman's Crop Husbandry Including Grassland, pp. 63-91. 10.1533/9781782423928.1.63.
19. Mikkelsen, R., and Roberts, T. (2021). Inputs: Potassium Sources for Agricultural Systems. In pp. 47-73. 10.1007/978-3-030-59197-7\_2.
20. USGS (2019). 2018 Minerals Yearbook-Potash.
